# Supplementary material for: Bioinformatic analysis and clinical diagnostic value of hsa_circ_0004099 in acute ischemic stroke
Source: PLoS One. 2022 Nov 18;17(11):e0277832. doi: 10.1371/journal.pone.0277832 (PMC9674149; doi:10.1371/journal.pone.0277832)
Supplement: S3 Table — (XLSX) [file pone.0277832.s004.xlsx]

## Sheet: mRNA
Target gene	miRDB	miRTarBase
BTLA	TET1	TMTC3
NAP1L6	NFIA	RNF138
PI15	PEG10	SH3GLB1
MRPL35	MYCN	INSIG1
AC016586.1	ZFX	PEG10
RP1-228P16.5	TET3	SFT2D3
COL11A1	CPS1	ADRBK1
GINS2	CCNYL1	VHL
PEG10	ACSM5	SMIM13
TCEAL4	TBL1XR1	HLA-A
PLAC8	WDFY1	LUC7L2
C1ORF220	SERTAD2	MYCN
CYCS	COL3A1	ZFP91
GNGT1	HMCN1	NASP
KRT79	COL11A1	ZNF134
C12ORF65	CBLL1	COL3A1
MTRNR2L1	MORF4L1	COL4A1
BRE	KLF6	COL4A2
AC008267.1	KLF2	COL5A2
ITK	BACH2	COL10A1
PMP22	PMP22	SPARC
CRISP2	SMIM13	FBN1
TMEM169	ZNF644	SERPINH1
TMEM88	GOLGA1	LOX
KIF13B	RNF19A	MMP2
PLGLB1	CAMK4	PDGFRB
PLGLB2	PI15	MDM2
KLF2	NAV2	SLC33A1
AP1S2	SMAD6	TAF8
CCSAP	PHTF2	CYP2C19
FABP1	DOP1A	KIAA1586
TSPAN32	DPYSL5	TMEM239
DAZAP2	MORF4L2	MORF4L2
SH3TC2	EML6	NLRP9
MTRF1L	ASXL3	OPA3
MB21D2	SESTD1	ZBTB8B
BASP1	CSDE1	TRPS1
STK19	USP6NL	TOR1B
RP11-1102P16.1	ISG20L2	TMPPE
CYP39A1	GXYLT2	TBL1XR1
TUBB6	DNMT3A	SLC36A1
HLA-C	DAZAP2	REL
HMGCL	CACNA2D3	PLXND1
NFIA	CRISPLD1	LEPRE1
DDX5	BASP1	ELMSAN1
SLC4A8	NAP1L5	BAZ2B
FAM9C	TMEM236	DAZAP2
SUMO1	PPP1R15B	ANKEF1
CACNA2D3	ADAM12	HLA-C
SPATA3	RAI14	PAX5
TMEM236	FBN2	CSRP1
CHST13	GPX7	COL23A1
HLA-A	TTC9	UBE2Z
KRTAP12-1	AP4E1	MORF4L1
CSDE1	BTLA	MCL1
CCDC43	SH3GLB1	TLE3
ADAMTS2	COL6A3	KLHL15
ARPP21	MOSMO	CTDSPL
PROM2	TCF7L2	BMP8A
RPL37	CMPK1	TRIM72
AC132186.1	OSBPL11	RPL4
C10ORF118	OTUD4	SLC2A12
C3ORF65	NONO	LRRC55
EIF4E2	XPO4	GPATCH2L
DENND2C	ANKRD13B	TMEM196
TMEM213	PPM1E	CASP8
PGM5	STX16	PKP1
ZFP42	HOXD10	SLC7A11
FGF9	PXYLP1	ENPP2
CBLL1	ZNF382	NWD1
PGM1	DBT	SPRY1
CD84	SPOCK3	STRN3
KRTAP12-2	DDX5	CDC27
CLDN11	TMEM169	FUT9
GINS1	N4BP2L1	PRRG4
ASB8	SLC16A14	PTP4A1
XKR4	ARHGEF5	PLAG1
HMGCS1	CUX1	ISG20L2
KDELC1	SOCS2	C18ORF25
ICOS	FOXJ2	ZNF695
C8ORF37	TNRC6B	AGBL5
TMEM71	GRIA3	RAB3D
SCAI	HS3ST3B1	ZADH2
WIF1	GINS1	SMARCA5
FGF4	LRRC8B	RUFY2
AP3B2	MLF1	KIAA1958
TSSK2	NLK	CDC23
KIAA1755	CRISP2	ZNF277
C4ORF36	ADAMTS3	C11ORF24
ZNF577	GRIP1	BTF3L4
MPZL3	CYP39A1
TIMELESS	PPP1R13B	MTRNR2L1
AHR	BABAM2	NPTXR
CSNK1G1	RND3	OIP5
FAM71C	CLDN11	Gtpbp1
NAP1L5	TAF5	Klf6
LINC00955	SNX1	Pigs
MYCN	DCC	GTPBP1
TARDBP	USP42	TMOD3
PSMG4	PALM2	PIGS
C5ORF54	FAM126B	NDUFA10
HAPLN3	FOXE1	MAP3K9
ZNF224	ZNF282	GNAQ
TBC1D26	STMN2	COX7A2L
AIMP2	SSC4D	LPL
RPS6KB1	FNIP2	GDPGP1
OIT3	INPP5A	CCS
ANP32E	TLL1	YIPF4
MTMR7	KIAA0895	ANKRD42
ING3	COL4A4	SNRNP48
ZNF488	CCDC50	TSHZ2
NMI	CAMSAP2	C9ORF47
NQO2	NCOA4	RFC2
CYP27C1	SUMO1	TERF2
TUBD1	EPHA5	NIP7
C7ORF73	ATP2B4	PSMB5
IFI30	RPP25	BBS5
SLC35B2	SCAI	FKBP9
TET3	TMTC3	SGOL1
ZNF37A	NAV1	KIAA1919
ADAM12	LDLRAD4	QPRT
SPN	SPC24	ORAI2
TFCP2L1	MBTD1	AQR
CSHL1	NCKAP5	ANKRD62
CLEC2D	SLC4A8	SLITRK3
DCUN1D4	VHL	SH2B3
LPL	PRKAB2	OTUD7B
CHIC2	NDUFS4	EMP2
ZPBP2	RIMS2	CXCL10
STIM2	ATRN	ALG14
CYP4F3	KIF26B	ZKSCAN2
NIPSNAP3A	SMAP1	METTL2B
ARHGEF5	SEC31B	GOSR1
PANK1	VPS37C	C7ORF55-LUC7L2
CCNYL1	COL2A1	TLCD2
LOXL2	TUBB2A	LRRC58
COL4A4	PPP4R3B	FNIP1
SESTD1	HMGCS1	LINC00632
NASP	COL5A3	MCF2L2
DDC8	BLMH	CERK
PCP4L1	UBE2Z	SGPL1
GRAMD4	EPS15	PANK1
HBP1	OVOL2	LCOR
VGLL1	COL4A1	GAPVD1
TET2	NAV3	ASXL2
FITM2	RPS6KB1	MRPS10
EREG	KLF4	PGM3
PRRG3	KLHL28	OTUD4
ORC6	C12ORF65	LRPAP1
CD244	DIP2C	MRPS16
COL3A1	PANK1	OSMR
SLC35F3	HAPLN3	MUC21
SERPINB9	IREB2	SIRT1
TMEM179	HBP1	ROBO1
S1PR4	AHR	PTEN
CDC6	SEPSECS	NR4A2
GJB7	OSTC	EZH2
CSH1	ADAM17	TRAPPC2P1
ZNF135	GPATCH2	PPM1D
TM7SF3	IL1RAP	FHIT
SEC31B	PLG	KRAS
GPX7	STK38	SMAD7
TUBB2A	DGKD	Pten
RPP25	OTULIN	IRS1
CAMSAP2	PTPRK	E2F3
RNASEL	PLEKHG3	DACH1
LILRA6	ASB8	MAP1B
VHL	FUT8	TP53INP1
C16ORF52	CCDC186	LMLN
MPV17	EIF4E2	FLVCR1
SCTR	CCDC43	ZNF268
AC012215.1	TNRC18	FOXO3
TMEM159	KDELC1	GHITM
IFNB1	CAMKK2	ZNF317
RPS6KB2	PPM1D	GPC5
XG	XKR4	ZNF583
ELN	LOX	SRSF11
PPP1R14B	TMEM88	SNRNP27
LEP	FNDC5	ACBD3
CDPF1	TTC30B	TMEM67
DCP2	IFFO2	HSPA4L
ZBTB37	RNF138	TCF7L2
MBTPS2	SETDB2	SFTPB
CCDC167	HIP1	OSBPL3
POC1B-GALNT4	IFI30	RAB11B
OVOL2	TRIB2	HOXA13
C10ORF68	EAF1	TMSB4X
WDFY1	PAN2	TAF1D
SMIM13	ZFHX4	ADSS
OBP2B	HLA-A	TNFRSF21
DLX5	C11ORF24	HIF1A
COL21A1	FUCA2	TMEM63A
RAI14	MBTPS2	PNRC2
TNFRSF10B	NEXMIF	CREBZF
OSTC	SNRK	44625
LINC00692	KRT79	DNAL1
POLE3	PLAC8	BACH2
YIPF7	HIF3A	UBXN11
MLF1	DDX3X	CKAP4
IRF1	STK10	STK40
NKAIN3	ITPRIPL2	ZBTB20
LIN52	COL5A2	NHLRC2
FAM211A	OXTR	TCERG1
CLEC4D	SLC44A5	VPS8
CREG1	GALNT13	TACO1
KIRREL	RNF217	CA6
ADRBK1	UBE4A	LACTB
FOXJ2	TET2	MXD1
NCOA3	SIPA1L2	MMGT1
GGCT	PAFAH1B1	CDC73
RPS15A	STAM	BTG1
TLR10	STIM2	FAM196B
EXOSC6	ZC3H12C	WDR82P1
CAMK1D	ACTR2	SLC4A2
C8ORF22	OIT3	ZNF490
N4BP2L1	AKTIP	LSG1
FOXN1	ENPP2	ELF5
CRISPLD1	BNC2	HINFP
HTR1F	CCNJ	MCL1
MORF4L2	ARMC8	BCL2L2
HOXA10	IDH2	TERT
TTLL6	KDM5A	CTNNB1
AIDA	ZSWIM6	CDK6
SNAPC5	PLXNC1	TAB3
SERTAD2	ISL1	CEND1
SMIM17	CTR9	CDK3
DUSP21	GPR37	NOTCH3
LTB4R	ELN	CCNL2
APOL4	ZBED8	FOXP1
SOCS2	ZFP90	ARIH1
HMCN1	PLXDC2	SNAP23
NIPSNAP3B	UBFD1	VHL
MYL6	ATXN1	SRGAP1
VASH1	PRRC2C	MTMR10
GALNT13	SPRY3	MAT2A
MAPK4	LPIN2	HSP90B1
PAFAH1B1	KCNK10	CDH6
CSH2	FBN1	CDC25A
AICDA	RABGAP1	CTPS2
SLC26A11	PTAR1	C14ORF142
RNF207	AP1G1	BAZ2A
RIT1	DCLK1	TMEM119
C2ORF72	SPTAN1	GPRC5B
MPP5	PLP1	FAM83C
FAM86B1	REV3L	FKBP5
FBXL19	SOWAHC	PHAX
GABRP	GIGYF2	MYLIP
ADAMTS3	LPP	FCGR2A
FAM106A	CDH6	BRIX1
C19ORF54	ZBTB40	C11ORF31
ORAI2	KCTD9	SLC2A5
AL078585.1	ZNF346	IBA57
PTX3	SEMA3C	ZNF410
C10ORF11	SLC35F3	BICD2
ITPRIPL2	SCMH1	PTMA
SVOP	RTKN2	ANP32E
SMAP1	BAK1	C11ORF54
SEPSECS	PAPOLG	NAT10
COMMD7	SLC2A12	OGT
TGIF2	ERC2	Thbs1
ARMC7	JAZF1	MRPS16
TMIGD1	PSMD11	C2ORF48
FBXO28	MAPK8	DCTN6
B4GALT5	MOB1A	CLPB
SLC25A45	VAPA	CBFA2T2
SELE	ZNF224	OGFRL1
SPDL1	SLC36A1	ZNF724P
B4GALT4	FGF9	CRK
TPBG	GNB4	PLA2G16
ZFP90	ELMSAN1	ZNF581
SLC26A10	SDC2	TMEM134
ACTR2	KCNB1	SEC14L4
GRIP1	PIK3R1	PPEF2
DRD5	ZBTB34	WSB1
MYBL2	LYSMD3	TTR
TMEM75	GPR180	ZNF770
CDCP2	FOXO3	PANK3
FMO1	PLAG1	PAG1
NOL9	ADAMTS7	NRXN3
EVA1A	LAMC2	MPV17L
TAF5	AZIN1	ABHD17B
PODNL1	OTUD7A	CENPN
GSTA4	RUBCN	TIAL1
CTSK	SOCS5	PDPN
KLHL24	MEST	LIPC
TMEM212	RAP1B	ELMSAN1
STK38	ZPBP2	ARL3
NANOS1	SLC7A11	RAET1E
IDH2	NASP	ZNF783
SDC2	ANKRD40	UGGT1
LPO	DOT1L	ZNF891
AP001579.1	KIAA0355	ZNF451
ZCWPW1	DLG2	ZNF585B
C10ORF67	KRAS	GPR75
EGR3	KCNE4	ZNF583
NECAB2	UNC5D	ZNF584
AL133373.1	CPSF7	RFC2
PPM1D	ICOS	GEMIN4
GPR37	RNF39	CACNG8
PRR9	USP34	SLC27A1
ASXL3	SCN2B	C5AR2
SLC5A7	ONECUT2	NAP1L4
C9	C2ORF68	CXorf38
ARSK	STMP1	ZBTB8B
C11ORF63	COL4A5	TMED4
NTRK2	ZNF577	SOAT1
PNLIPRP1	KCNIP2	SLX4IP
GPATCH2	TRIM71	SHOC2
SUV420H2	STEAP3
AC005481.5	SDK1	PER2
DSTYK	SEC63	GNS
SEMA3C	C8ORF37	CD164
LENG9	UBE2K	VWA2
TPMT	ACTR1A	SPRTN
SNX24	RAPH1	DCP2
CYP2B6	PLGLB2	UGT2B4
MED24	ADAMTS10	KIAA0101
USP29	CORT	CDKN1A
DBT	TIMELESS	CD274
SPTAN1	CENPS-CORT	GNG13
TRIM63	FMC1-LUC7L2	DR1
KIAA0355	COPS7B	BTG3
TCEANC2	PLGLB1	UBE2D1
TANGO6	PTP4A1	TMBIM6
SLC30A8	LUC7L2	CCNK
TTC37	COL1A2	ADORA2B
BLMH	GRIK4	ZNF148
KCNK12	BRWD1	ADD1
EXOC5	HERC4	TNPO1
KLHL28	ACVR2A	PEG10
ZNF699	COL10A1	NUFIP2
COX7A2L	FGF4	FAM217B
ZNF366	CWC27	NR1D2
CCDC36	PROM2	ABHD17C
MAFG	KLF12	NRBP1
ANXA2	PDXDC1	DYNC2LI1
TDG	CDC23	LONRF1
ZNF783	NRAS	PPIF
AP5S1	MPV17	CRY2
HES6	ZNF366	EFHD2
OPCML	COL7A1	AKIRIN1
FUT8	USP36	FOXJ3
SERP2	RPL28	MKLN1
PPP3CA	NR4A3	PLAGL2
CASP8	RAD21	HIST2H2AA3
TTC30B	GRAMD1B	HIST2H2AA4
NUAK1	WDR26	DCAF7
SMCO1	RIMS1	BUB3
ADAMTS17	NSD1	SETD1B
MED11	RRAGD	RGPD4
RCAN3	SSH2	SNRNP27
C2ORF68	HLA-C	EN2
AC026202.1	HOXA10	C2ORF44
IREB2	PGM5	PAIP2
TET1	ZMYND11	PNKD
LAMC2	MAPK1	MED30
NREP	DLX5	C16ORF58
TLL1	KIRREL1	TXNDC5
USP34	IPO7	NDUFC2-KCTD14
TLX2	STK32B	FAM136A
COL4A1	ZNF236	DDT
SPRY3	STRADB	OSBPL10
VPS37C	TMEM191B	HMGN1
HAUS2	PPP3CA	PLA2G2D
HMGA2	ARPP21	TRUB2
MSTN	CAMTA1	MAMLD1
DDX49	MED24	MANEA
ISL1	SPN	ERC1
CLEC3B	PDGFB	PRELP
CCND2	TMEM191C	GPIHBP1
STX16	TNFAIP3	PIGO
TPK1	PAX9	KIAA1009
CLCN2	ELOVL4	NECAB3
IRAK1	TFAP2C	ZNF800
RNF217	SMARCAD1	ZNF618
TERF1	HIPK1	ZBTB38
C3ORF72	BEND4	USP46
CAMK4	RIT1	UGCG
HMGCLL1	AFF4	UBXN7
DENR	TRIM16L	TOR2A
EFNA5	ADAMTS2	TNRC6B
FZD4	HMGCL	TMEM91
TMSB15A	MID1	TGFBR3
LAMA2	ARFGEF2	TARDBP
SS18L1	TRIM16	SPATA13
SMYD1	BIVM	SFXN4
KIAA0907	SLC9A2	SFXN1
EML6	ASAP2	RREB1
ENPP2	CUEDC1	RAP1B
KCNB1	ILDR2	RAB14
RND3	CREG1	PSPC1
MAP2K4	ELOVL6	PDIA5
MMP8	RIPOR2	PDHX
ENC1	HDAC9	OTUD4
FAM126B	LOXL2	NRAS
CIDEC	ACACA	NOLC1
ISG20L2	SBNO1	NLK
DMRTB1	TANGO6	NCBP2
CPS1	ING3	NAA20
GPRIN3	BRWD3	MRPS14
DOPEY1	AGPS	MIER3
C22ORF46	TENM1	LIN54
PCSK5	NOL10	KLHDC3
PARL	CYCS	ITSN2
PIGG	MFAP3	ICK
PDXDC1	C18ORF25	HAT1
PRKAB2	ARID1B	GSE1
MEX3B	CYP27C1	GPAM
C1ORF110	ADSS	GNPNAT1
C21ORF91	MTMR1	FNDC3A
KIAA0101	FOXN3	FHL2
BMPER	CAMK1D	FAM73B
HMHA1	PRPF4B	ELOVL1
COL10A1	ZNF844	DYRK3
BIRC2	RAB3C	DAZAP2
COPS7B	BCL7A	CYP1B1
TRIB2	NBR1	CTNND1
SYP	CCDC113	CSRP2
TMEM183A	SLC39A8	CELF1
COL2A1	KCTD20	CCND1
TRIM44	PHACTR2	C8ORF4
SLC35A4	CHIC2	C5ORF51
C2ORF44	MEX3B	BDNF-AS
DRAXIN	RHOBTB1	ARL6IP1
MBD1	EXOC5	APPBP2
SLC22A7	HAS3	AP1G1
QPCTL	PDE1A	ANKRD40
PHTF2	SLC29A3	ALG9
SLC9A2	HEY2	AK2
ZNF614	FAM71C	IGDCC4
CST3	CDH5	SUCO
ELOVL4	CLEC4D	NECAP1
CDC7	ZNF737	NLRP2
ELP4	APPBP2	LFNG
TSPAN5	MXD1	ZNF384
CCDC110	ZNF134	MKNK2
FLJ20306	TRPS1	ZBTB20
NHLH2	NANOS1	AP3B2
C10ORF55	TCEAL4	TSPYL1
RPS21	TPM3	ZNF460
RNF39	SH3BP2	PISD
SRSF3	MGA	FAM84B
NCKAP5	SYNPO2	CHEK2
ACPL2	OXR1	BTG2
C4ORF45	SENP5	ARL5B
RNF19A	ZKSCAN2	ZFP36
EPHX4	NCOA3	HOXA10
CCDC38	MIB1	GTF2IRD2
FUT5	PCGF3	PROX2
PNRC2	MRPL35	KRTAP13-2
ZBTB40	SHE	METTL8
C16ORF87	PROX1	TIGD2
PAX9	IBA57	ZFHX3
C11ORF24	UBTD2	YIPF4
C19ORF12	EP300	TOMM40L
AGAP10	HECW1	RNF152
MBL2	BBX	ARNTL
AC008443.1	ATAD2B	WDR77
BX088651.1	ZNF37A	PPIC
FETUB	PHF21B	NPTN
KIAA0895	SLC20A2	LIFR
OXTR	FRS2	HOXD11
MUC22	MCL1	EIF5A2
AGAP9	LZTS3	TMEM254
SLC16A14	POLR1D	ID4
RNF138	NKD1	ZBTB18
DNAH17-AS1	NRG1	USP25
COL5A3	WIPF1	SLC7A2
PTP4A1	GNAQ	RBM12B
MOB2	TMEM135	PKNOX1
COL4A5	G3BP2	MAP1B
ARRDC4	SGMS2	ALDOA
LDOC1L	ARVCF	Osbpl10
PDCD7	DCUN1D5	Pxdn
TCF24	ZNF148	HS6ST3
PSKH1	TTC37	ZNF106
GNAI3	FNBP1	RBBP5
ST3GAL1	TMEM56	SERBP1
SFT2D3	ZC3H6	SPIB
RABGAP1	CDK14	SLC26A2
FOXO3	TMEM212	MAPK1
HIST1H3H	TMEM87A	KCNK5
EPS15	B4GALT5	HRK
HTATIP2	ATF7IP	UBXN11
PIK3CD	RBM41	NR2F2
MYH14	TUBB6	KCTD12
DPPA3	C19ORF54	ZNF175
C9ORF47	NFYC	WNT9B
AK4	SMCO1	SMAD4
TLR4	HERC1	SLC6A17
IL11	ZIC5	SLC25A25
FER	RCOR3	OLR1
COL1A2	SPDL1	SLC25A44
HS3ST3B1	FZD4	KHSRP
UBE2D4	COL19A1	ISCA2
AP4E1	XG	RUNX1
AC073610.5	STK19	MITF
AQP2	USP7	ANP32B
TUSC1	SRGAP3	HMGN5
GJA3	TPM1	RGS6
SNIP1	COL21A1	TGOLN2
AGAP8	EYA4	ANKS1A
UBFD1	CTSK	TMCO5A
TNFSF11	MARCKS	IFNAR2
AGAP7	PPDPFL	BAG2
PROX1	HPGD	NUDT21
RGS17	DGKK	FBXO46
NCR3LG1	NDST1	CFDP1
TM6SF1	LRPAP1	MTA1
CPSF7	KCNJ2	STARD10
ZNF716	ZFP42	VCL
AGAP6	GLI2	MTA2
MOB1A	TRAF3	PVRL1
TRIM16	IL11	MCL1
TRIM16L	TPBG	CDCA7
LPP	MTMR7	CHAC1
AGAP4	GINS2	GNL3
C7ORF55-LUC7L2	BMPER	ABHD5
MARCKS	ZMYM4	TBC1D13
PAN2	SLC5A7	SRGN
FAM196A	ITSN1	MDM4
AGAP5	PIK3C2A	MDM2
ANO2	SELE	MGMT
DCLK3	SPOUT1	TSTD2
IFFO2	RGPD2	ZNF646
FAM227A	TMEM74	SRSF7
OGT	EPB41L4B	ZFP69B
AEN	C11ORF87	TMEM209
KIAA1328	AHNAK	TLCD2
SLC22A9	TMEM71	LYRM4
ELP5	CCND2	SLC9A7
NRAS	NMI	MRPS17
C21ORF128	STRIP2	OPA3
SNRK	SUB1	ZER1
NBR1	BIRC2	PSMF1
PRR26	HTR5A	POLR2D
SIM1	CLEC2D	NUFIP2
CMPK1	MMAA	IKZF3
MAP3K8	ABAT	HIC2
DNAJB6	SOX4	CRISPLD2
BACH2	KRTAP1-3	C7ORF73
TMED9	PSKH1	BMP3
ENPP6	TP53RK	AVL9
KLF6	SIM1	CCDC64
PDGFC	FAM13B	SIPA1
PPP1R13B	SUN1	GPR153
MUC7	XIRP2	NKX2-2
C9ORF163	C11ORF54	MLLT1
REL	HEY1	ADAMTS17
FSTL1	WDR33	KIF6
RNF141	MB21D2	TXNDC16
PSMA4	SYNJ2	ZADH2
C7ORF76	C6ORF106	ZNF460
KCNE4	SLC30A8	YOD1
ABCB6	NPAS3	BZW1
RNF168	GM2A	ZDHHC18
AC104841.2	DIXDC1	C18ORF25
INPP5A	BCL11A	CNTN4
SLC36A1	SCTR	RSL1D1
FBLIM1	IRF1	ZNF865
COMMD5	NFIC	EIF3F
KLF4	SRSF3	DMKN
RAB22A	CHST13	CD36
STK32B	IFNB1	QRFPR
FKBP14	HMGB1	TFPI
CTSO	FAM135B	ONECUT3
PEMT	MUC22	RAB42
AXIN2	FRMD5	NTMT1
LUC7L2	BCL11A	F8A2
OSMR	ATP11C	F8A3
FAM43A	DACH1	NPR1
WDR38	ATP1B1	DARS2
MTRNR2L5	ANLN	ZNF277
AC010336.1	SLC38A2	CYP20A1
NDUFAF7	ZCCHC2	SLC35F6
B3GAT2	KDELC1	RNF222
SUN1	SH3PXD2A	NT5C2
TMUB2	MIER3	NDUFV3
GTPBP1	APPBP2	RAB11FIP4
C1ORF131	YTHDC1	FAM175A
VSX1	SPOPL	UGDH
COLEC11	COX18	CLK4
PLEKHG3	EZH2	ANKRD62
C5ORF64	PPM1A	C15ORF40
SIAH3	ATP8A1	C7ORF55
ARHGEF15	CHN2	NOM1
TRPS1	C5ORF24	C1ORF35
BTF3L4	GPM6A	KCNK6
METTL2B	TXNDC16	MLH1
LRRC59	RIMS2	TMEM59
PTPRK	RHOT1	ST13
CD93	ICK	NPFFR1
VHLL	ALDH16A1	NKAP
ZNF791	POLD3	MAGI3
SOCS5	PPP4R2	LSM11
SPOCK3	DOCK3	DSTYK
THAP8	HNF1B	CRLF3
ZNF420	DACT1	CEP97
RAP1B	RAPGEF6
ZBTB43	CDYL2	CLPP
RBM8A	PPM1D	COL18A1
NAPB	TMTC4	IL17REL
C1ORF145	GBE1	SSH2
HIPK1	SCAMP1	ZBTB44
KDELR3	RTF1	EIF3H
INSIG1	RAB4A	DNAH10OS
DDA1	MAST4	EMC1
BHMT2	TTC28	GAPVD1
CEP72	ZNF92	ZNF766
PATE4	STT3A	SLC24A4
LAS1L	SCN9A	SSH3
OTUD3	PSIP1	NPY4R
CUEDC1	PDE12	PIGR
CD38	GXYLT1	FAM83F
XDH	CA8	CXCL10
OTUD4	FBN2	ZNF417
DCAF12L1	TUBB6	F2RL2
HMGB1	KRAS	PON1
GNS	FOXL2NB	TOR1AIP1
ACTR1A	WAPL	HIATL2
CYP4F31P	KATNA1	ZNF43
RSPO1	USP27X	PARP2
FAM13B	ACER3	ATP8B3
NRG1	AAK1	ZC3HAV1
GALNT4	MTERF3	TBCCD1
WDR26	ZNF680	SMU1
MEST	HIPK3	VWA7
FBN2	NAB1	ORC1
MBTD1	LPAR1	GABPB1
PSMD11	YOD1	XRCC2
NCAPH	MYEF2	PEX2
ACP2	VSNL1	FUT1
ZNF134	ADGRB3	C14ORF142
RAB3B	ATF1	FUT9
GALNT10	MGAT4A	POLR3K
NDE1	SEMA3A	QTRTD1
PDE4C	FGFR2	SERPING1
TM4SF18	PTPN21	LIMD1
SCN2B	HSPA9	PAICS
BCO2	ASXL3	ZNF331
KCTD9	DDX53	C3
ANGPTL4	MRE11	AKR7A2
SHE	HS3ST3A1	APOC3
DNAJC28	UBL3	WDR13
FMNL2	ITPA	PTK6
IMP3	ZBTB24	MRPS10
STRADB	CTNNB1	ZNF280B
KIF18B	NFAT5	TIMM8A
ZNF831	HIVEP3	RPS15A
DOK1	NSUN3	PRRG4
KTI12	C18ORF63	PLEKHA3
ZNF519	CHST11	PDE12
VWA2	PROX1	RNF20
SOWAHC	SOS1	LRIF1
SLC25A48	DACH2	ZNF695
KLF12	PQLC3	LETM1
ADSS	C8ORF86	RAB3D
KCTD7	SEC23IP	TMEM245
ZNF160	ASAP1	SMARCA5
ATXN1	URB2	ISCA1
PRR3	PANK1	P2RX3
MCL1	RPL13	Tbc1d13
LCA10	RBSN	LANCL3
CISD1	KCNJ6	ZNF543
PLCL1	WNT3	TANGO2
COL6A3	ATP9A	ANGPT4
HMGCS2	TOGARAM1	SPRYD4
SIGLEC11	TACC2	GMPR
A4GALT	CROT	PDE4C
BCL2L1	KLF12	ZNF610
TMTC3	ATG7	NDUFB5
ESR2	TDO2	RUSC2
TBCCD1	KCNH5	SRPX2
HFE	CREB5	PXMP4
TCL1A	PPM1F	POU2F3
STAT2	ACVR2B	MED28
NME6	ADGRG6	FUS
CHST6	USP15	ACAP2
PPARA	RUNX2	TNFRSF13B
TMEM65	RAP2C	CCT4
ANKRD13B	ANO3	RNASEH2B
CCNJ	LMO7	BBS5
Z98049.1	KCTD9	VEGFC
HHEX	KCTD20	USP1
FAM124A	MAMDC2	TMEM65
YWHAE	DNA2	GOSR1
HRK	VAT1L	ELOVL6
NLRP10	FAM98A	SLC35E2
TUBGCP2	TLK1	GK5
NPAS3	CUL5	COX18
PTAR1	SLC15A2	SLC11A2
FAM216B	G6PC	CHAF1B
COL8A1	PRKAR2B	TBC1D24
TMEM259	TDG	DEFB105B
CHMP1B	NUP214	DEFB105A
CLN5	CCNYL1	SC5D
SPRR4	MPHOSPH9	CTNNBL1
CDC23	FAT3	PPEF2
CAMKK2	DMRT2	IDE
TMEM119	ELOC	ENTPD1
CAPRIN2	BICC1	ANKFY1
SOX4	ST8SIA6	ISG20L2
TMPRSS11A	BDKRB2	SLC25A16
PRPH2	ZNF257	KIAA0101
POTEE	TIAM2	RNF135
ADORA1	DOCK4	PRSS21
SH2B1	TEX101	TRIM16L
UCK1	DISC1	TACR2
BPIFA2	GKAP1	MCCC2
SLC6A13	TMA16	FRMD8
ELMO2	CORO1C	ACAD8
GBAS	ZCCHC4	TACO1
C10ORF54	SLC25A27	OTUD7B
GABPB2	EFHC2	HM13
DEAF1	ZNF736	GPR75
UPK3B	ERCC6	CRKL
DTWD2	SLC4A4	ALG14
TBL1XR1	PICALM	S1PR2
NANP	TMEM65	TBC1D15
PLAC9	ASXL1	SLC16A4
ITIH1	LEPR	ORAI2
PRRC2C	GRIK2	ZNF554
GPRIN2	MTTP	SF3A1
ZNF772	KLHL29	RNF115
GOSR1	AGFG1	MYPN
USP42	TMEM68	METTL8
LEPRE1	OTUD7B	HAUS3
FZD5	ZNF721	EHD4
AL603965.1	PCNA	CCNG1
AL591684.1	KPNA4	ZBTB8B
KCNT1	G3BP2	OLR1
SPDEF	MBD2	ABCF3
ZMYND11	ANP32E	HACE1
SSR3	PARD3B	HIST1H2BN
NUDT3	LRP6	OLFML2A
ADAMTS14	NPAS3	NUPL2
PLP1	REST	LIN9
ZNF22	CHPF	SLC33A1
MTNR1B	TNFSF11	AAED1
KCNIP2	ZNF708	INTS7
IRF8	NAP1L2	KCNE4
KAL1	FNDC3B	RBM28
B4GALT6	KIAA0408	PARD6B
PPP1R15B	WDR48	LIX1L
LTB	NF1	EIF4EBP1
ABHD11	GTF2H2	PSMD9
AS3MT	LIN9	CA6
SETDB2	EHMT1	TMCO1
LRRC55	MED17	DNAJC28
PALM2	NEXN	C9ORF156
44621	ZNF711	XIAP
AC105020.1	SEMA6D	FAM73A
SNX1	TMEM178A	ZNF292
MAFB	DNAJC5	RPL12
HIF3A	NDN	NF2
SMARCAD1	AGO4	SUSD5
SLC12A8	RBFOX1	A1BG
ZNF713	MORF4L2	TIMM10B
ZNF460	FAM169A	ZNF878
C1ORF147	IVNS1ABP	TBXA2R
NCF2	GTF2H2C	MCTS1
SERPINB8	CTSV	TUFT1
C12ORF60	STX1A	ANGEL1
LIN7C	NIPBL	TRIOBP
TPRA1	ANK3	TMEM184C
TRPM8	ZNF799	PLXNA3
PSMD5	WWC3	NFATC2IP
TCEB3B	EP300	FKBP14
TMEM165	GVQW2	C3ORF70
EDNRB	ZNF443	IRAK1BP1
RGPD1	DIO1	RPS19
FAM169B	TM9SF3	C5AR2
AGTRAP	ADSS	ZNF101
WNT5A	TRIM13	RBM23
ZNF383	SNRNP27	PPIL6
SREK1	DKK1	C17ORF105
COL5A2	HMOX1	LAX1
NUMBL	SIRT1	FAHD1
PAQR3	PGM2L1	SGSM2
TNFAIP3	MOSPD1	ATP13A4
TFAP2C	GNL1	DNA2
RGPD2	SLC4A5	ALDH1B1
SYDE1	ZNF438	AGMAT
SRCRB4D	MTURN	PARD3
ARHGEF19	HNF4G	EXOSC2
NDP	NALCN	TECPR2
DDX21	ARL4A	TPGS1
TCHP	KCNMB3	HIST1H2AG
PAQR4	PROSER1	CENPL
MFAP3	FOXO3	ZNF383
MICB	ZIC1	PPIL4
SFXN3	AGGF1	NLRP9
NKAIN1	ZNF493	CHST6
LHFPL5	TET1	MCF2L2
FNDC3B	STEAP3	STX4
IMPDH1	TMEM87A	ANKS4B
KCNJ15	TRDMT1	PLAC8
BRMS1L	YME1L1	MRPS21
CORO2A	DYRK1A	C19ORF52
TAF13	TLR4	LYZ
KLHL40	USP9Y	ZYG11A
SLC26A6	SMC4	UBXN2A
ZNF471	NLGN1	TVP23C
BIVM	NT5DC1	STK4
CCDC149	DCAF10	SIX4
REV3L	TMEM135	KIAA1467
NCOA4	SFMBT2	IRGQ
PRUNE2	NCAM1	HMX3
MSN	ABCC4	HERPUD2
FBN1	YBX3	FAM127A
STAM	RABL3	DDX19B
ZNF780B	SATB1	DAND5
C8ORF31	LCOR	CHRFAM7A
SERTAD4	TMPRSS7	CDC73
RIPPLY3	BAG3	ATL2
ZNF431	PTPN14	CPM
FBXO44	GPC5	JMJD4
RPRD1B	FOXG1	BTNL3
USP7	DNAJA1	KIAA2018
OTUD7A	ZNF607	YWHAZ
CCDC126	RIN2	FAM212B
YIPF1	GOPC	NXPH3
ZNF551	TRIL	PHF7
STRIP2	PCDH15	SHE
ABCE1	DCLK1	TERF1
PINX1	CHRNB1	EHHADH
TSPAN4	KIAA1217	RNF125
RPUSD1	COL6A6	STON2
SLAMF1	ATCAY	TMPRSS11BNL
TKTL2	FBXO11	ABHD12
KLHL25	EDIL3	SNX20
GTF3C4	GLRB	SNRPD3
PRX	GALC	SDHAF2
PTCH2	TTC30A	CRCP
PAQR7	CHST15	SH3D19
RUFY2	ZNF268	TMPRSS6
CXADR	ARHGAP40	COA4
CYB561	PIKFYVE	PEX11A
QKI	ITGAV	DGCR6L
MED8	TOPORS	CCND2
WDR82	NUFIP2	GRAMD4
ANKRD10	PAX9	CLIC4
WASL	SHCBP1	BLOC1S3
UBE2Z	PYGO1	PPIF
AC093802.1	GOLGA1	MOB3A
RAX	ST8SIA3	SMYD1
LPAR1	DCBLD2	TBC1D13
RORC	RMND5A	SPRED1
HAS3	LBR	AEN
GDAP1	SEPT11	CD274
ANKRD40	FAR2	CNR2
SNX3	GMFB	PYGO1
EAF1	RLIM	ALOX15
PRDM1	RBM38	KIAA1456
GTDC1	IPO11	CARD8
FTO	CTXN3	TTC39B
GRAP2	ZBTB20	PSD4
PPM1E	LHPP	ZNF527
LRP11	ZDHHC5	SUMF2
TGFA	GDI2	ZNF589
SAMD12	GHITM	CERS1
KLHL15	XPO4	RHD
PIK3R1	MGAT5	TBX20
ARNTL2	BOD1L1	SLC35E3
MOCS2	EFNA5	PPP2R2B
N6AMT1	MOSMO	MYADM
KLF9	CCNL2	PLEKHM2
KLF17	TCF7L2	ID3
NEFM	THBS1	TIMM8A
PLCXD3	SENP7	BCAS4
CLCF1	CNOT4	CYP2C19
TRUB2	AKAP2	LIX1L
LRRC57	PPARGC1A	SERAC1
WNT2B	PDE5A	TMEM63A
AC011484.1	LDHAL6B	ZNF669
AC007390.5	BNIP2	APOLD1
RP11-766F14.2	CCSER2	HSD3B7
TBPL1	IGF1R	POFUT2
EPHA10	LAMA4	ZNF587
MYO1D	PKP1	KLHL25
GPN2	SEL1L	GNL3L
EPAS1	FN1	ZNF212
ROR1	ZNF273	APAF1
GDNF	TBC1D15	MRPL12
NUAK2	BLOC1S6	ATP6V0A2
DNAJC24	TWSG1	ABCF1
MRPL30	CLIC4	CYP8B1
C2ORF15	ZNF100	PFAS
ZNF276	CD36	DNM2
FOS	CUX1	KIAA1551
MMP16	DOK6	ZNF17
GPKOW	GPATCH2L	SLC25A33
NPHP3	ZMYND11	RRM1
MRPL43	DGKK	RFT1
AC132872.2	YIPF6	DNALI1
PIK3C2A	UBXN8	CDCP1
TEX22	MAPK1	GNG3
HIST1H3F	YWHAB	PDE11A
COL19A1	POLM	ARL14EP
XIRP2	CAV3	GUF1
SPATA2L	NLRP2B	EGF
CEMP1	ASAP2	STK17B
CTD-2368P22.1	LAMP2	DCPS
CHST3	ESCO1	KCNK6
SHOX	SOD2	TIPIN
AC016559.1	PTPN4	SLFN12L
ZNF225	C17ORF51	ACSBG1
CDC42EP3	SFT2D3	NEDD4L
MRPL49	UNC13C	NECAB3
PAMR1	SCN4B	CCDC77
HIST2H4A	EXOC5	MSANTD2
CACUL1	C5ORF15	KRR1
RBBP4	EIF2AK2	GSR
CLDN18	HOXC11	MTFMT
KIAA1671	SPTLC3	ZNF788
TMC7	SH3BP4	VPS4A
TMEM234	RAB17	VASH1
ENKD1	CALD1	UGGT1
BAK1	TMEM67	UBE2F
SMARCC1	SFPQ	TMED10
MYCBP	ESRRG	TBXA2R
TNFAIP8L1	SOGA3	SYNGR2
RNF150	TMEM170B	STX6
DMRTA2	SNX27	SPPL2A
CD99L2	HSPA4L	SMARCD1
AKIRIN1	WDR82	SIKE1
CXXC4	GOLGA6L4	RRM2
DDI2	HOMER1	RPRD2
ADO	SAP30L	RNF20
TDRKH	RASGRF2
COL6A2	FEM1C	RNF144B
ENDOU	TFCP2	RAD21
SLC25A13	CDC14A	PTPN14
NEUROG2	PLPPR4	PSMF1
AURKB	TOR1AIP1	PAPOLA
RPL12	AMHR2	NFIC
STX17	CHSY1	NACC1
NECAP1	RASSF3	MTMR10
FAM109B	KIN	MAFK
ANKDD1A	PDSS2	KREMEN1
RAB36	DBT	KLHDC3
LIMD1	SLC1A2	KLF2
TBC1D9B	SLC35G3	HSP90B1
ITSN1	MEF2C	GXYLT2
SIPA1L2	NOM1	GNS
POLH	NUP58	GM2A
GSTO2	TET2	GDE1
KIF5B	PPM1E	GABPB1
AC115618.1	GUCY1A1	FADS1
ZNF749	PINK1	EVI5L
CMTM6	OCRL	ERGIC2
PNPLA3	TUBB1	EEF1A1
FAM71F2	SYN2	DCTN5
MLK4	SURF1	CTDSP2
TCF7	HSPH1	CRISPLD2
SOX12	HECTD2	CPA4
NDST1	POC1B	CNBP
ADAMTS7	SURF4	CEP97
STX1A	TBP	CDC5L
AIM1	RICTOR	CD4
VASH2	SIPA1L2	CALR
PDPN	POP1	C9ORF41
NMNAT1	SOWAHC	BBC3
METAP2	ABCC1	ARL5B
PAPOLG	ID4	ALG8
OSM	SLC39A10	AHR
AXDND1	MAP1B	ACTR1A
SVEP1	SLC5A12	IAH1
NCKAP1	TRPS1	TRMT112
C1QTNF8	CLEC7A	CLCN7
RAD21	RPAIN	IFNLR1
GABRA3	SLC31A1	SLC6A1
DCX	RBM33	VPS52
RAB42	DYNC1LI2	NRGN
PIGR	SECISBP2L	MEX3A
FGF23	DGKH	POFUT1
TMEM38A	CCT6B	VPS18
LYSMD3	FPR3	MMAB
PI4KA	GRSF1	SLC25A45
FOXN4	RTN1	AGAP9
PGM3	KMT5B	ATP13A4
DCAF4L1	DYTN	CBS
ITGAD	EEA1	LHPP
NCBP2	CEP68	TIAL1
FAM115A	REEP5	SLC35F1
TPI1	ACSL4	SPTBN2
SF3A1	UBA6	C1ORF210
ZNF852	EYS	RSRC1
MAN1A2	KIF2A	AK4
GATAD1	KIAA2026	ZNF641
JAGN1	PLXNC1	FAAH
RP11-863K10.7	MBTPS1	IKZF3
UAP1L1	IL7	EMP1
CD28	ZNF695	SURF4
SREK1IP1	GLS	TMEM145
RRP36	SEC14L5	PGPEP1
SENP5	ANTXR1	SLPI
NIPAL4	EIF5B	KLLN
KIAA2022	BTG1	IRAK4
CHMP4B	AKAP10	ZNF747
ADAM17	TMEM263	MCM8
MC2R	ARL11	ZBTB8OS
AL359878.1	PURB	MRPS16
NOL10	MKRN1	ZNF100
ZBTB44	AKAIN1	PRIM1
N4BP2	UBE2E3	NPAP1
SERBP1	RYBP	PROM2
DPYSL4	ZNF302	DSCR3
OTOGL	SLC39A12	MPLKIP
ZNF697	SMAD9	CSTF1
CHD5	FREM2	ZNF805
ABAT	HMGB2	SLC30A5
PABPC1	NPHP3	RPL35A
TCF4	BICD2	PTPLB
GATA5	PCGF5	PPP1R15B
ASCL4	SLC7A11	POLR1D
ELOVL6	UBE2K	NKRF
PEX26	PLEKHM1	IGF1
AC068987.1	TRIQK	GSG2
AATK	FNDC1	DNA2
RFX7	SELENOI	ARHGAP11A
GAPVD1	AFF2	ZNF620
RAB11FIP2	MFSD6	TMEM86A
SMIM14	PHF6	SMURF2
ZNF280B	ST8SIA1	DSTYK
LHFP	DENND1B	SYAP1
ENTHD2	PTP4A1	HEYL
NCALD	SLC2A10	FOXO3
ZNF300	CPSF2	ZNF224
KIAA2018	ENTR1	SPATA18
TLCD2	SAMD9	GGCX
PLAG1	IMPA1	TCEA3
CLPP	DHX40	SLC2A5
FAM196B	DLX3	CBY3
HSDL1	LUC7L3	PMPCA
DIXDC1	TREM1	MCF2L2
KRAS	PTAR1	MRE11A
C2ORF54	NAA25	ZNF431
MOB1B	FGF2	ITGA3
NAA50	ENAH	ZBTB18
KCTD20	PCDH17	RNF11
TOR1AIP2	IPO8	PPM1L
KLHDC10	SENP5	HOXB3
TRIM71	ZNF773	ELAVL2
OCLN	BRMS1L	AHCYL2
ADAMTS10	EIF3J	LIN7C
TACR3	THSD7A	CENPN
KCNJ12	ASPH	NDUFA7
TSPAN3	PCDH8	LLPH
RHOBTB1	CERS6	EMILIN2
PCGF3	HOMER2	NKAP
CTU1	DPYD	LRIG2
CACNG8	MRPL9	GCC1
SPINT1	KRT35	SHC3
C21ORF49	SKA3	RAB8A
GRM5	GRHL1	DNAAF2
NNAT	YBX1	VPS8
TOP3A	RBM20	ZBTB7A
IL1RAP	CNTN3	CCR4
SGMS2	CASS4	EXOC8
TRABD2A	NEDD4	AMICA1
KIAA1024	TSHZ1	Cd99
SRRM3	TXNDC17	Gnl3l
NALCN	LMAN1	Igfbp4
BCAT1	EPC1	NOP14
GGPS1	ZMPSTE24	TBC1D24
SNW1	MBTPS2	ARSA
CTCFL	FBXW11	MICA
EPC1	KLHL32	THAP1
KCNMA1	LRRN1	BROX
ZNF70	KIAA0825	ZNF556
MAT1A	RAB9B	ANP32E
SRL	PDCD6IP	ZNF681
AGAP1	NSD2	MBL2
CTTNBP2NL	FSD1L	SLC16A4
USP13	ZNF492	AQP6
BTD	ATG4C	CD3EAP
RIOK3	NOVA1	SIX3
SDK2	SETD4	STX7
ZNF75D	AMER3	STRIP2
LALBA	SORL1	SRCIN1
PSTPIP2	NR4A2	PGAM5
ZBTB8B	IKZF5	KIAA1210
ABLIM1	FAM49B	FBXW2
KIDINS220	LPP	ZNF665
ATP2B4	IP6K3	SMAD9
UBTD2	SLC19A2	KLHL23
MPDZ	HBS1L	C2ORF48
BACE1	UBXN2B	INADL
ENPP7	CDYL	ZNF749
SCNN1B	TMEM154	SLC30A6
ARHGAP10	VKORC1L1	TRIM65
HOXC13	MAPK8IP1	LINC00598
CORO6	MAF	NUDT19
MRPS7	SUB1	SRP19
GLI2	TTL	RPL28
ERCC4	FLVCR1	OLFML2A
ACOT4	MICB	NDRG3
COL7A1	CSMD2	CLPB
SMEK2	TM4SF18	CCDC68
FGFBP3	SLC1A1	KIF1C
AP4S1	PBX2	TAF8
RP11-10A14.4	RAD23B	ENTPD5
ZNF518B	ZNF681	SPC24
FNIP2	APAF1	PCDHB11
ANKRD36	KTI12	SLFN13
RP11-111M22.2	RAC1	CDKAL1
LYRM2	NIN	CCL22
COMMD2	TFDP2	ZFP62
SMIM12	DPH6	SNAPC3
RNMT	HNRNPA3	FRRS1
POLG	LCA5	FBXW8
TESPA1	SEC14L1	DNAH9
HOXD10	CEP85L	RAP2B
TMEM130	SRSF8	NDST3
MACC1	TMEM33	PDCL3
SERPINB10	INSIG2	OGFRL1
NFYC	KLF5	GLRX2
KCNN1	ZC3H12B	RBMS2
ZKSCAN2	NCOA7	TRAPPC2
GATC	PRRG1	PPEF2
NFATC2IP	HACD3	ALDOA
POU2F1	C11ORF87	RABAC1
ANKRD62	AKAP6	ZNF581
PCBD2	KIAA1549	HRH1
JDP2	COL21A1	UQCRQ
ADIPOQ	HMGN3	ZNF639
SLC7A8	EXTL2	HEXA
AP000679.2	KIF5C	RCBTB1
HERC1	WASF3	DOCK7
ARVCF	PNRC2	ZNF141
TJP2	SIAE	UNC13D
GPR1	ADAM9	ZNF770
MIP	RAB3D	UBE2N
REEP5	ARNTL2	SUN2
AKAP5	WDR77	SUMO2
TNFAIP1	GFOD1	RBM12B
MYOZ3	OPN3	PRICKLE1
CCDC57	FBXO21	PKNOX2
SLC39A13	GID8	NRXN3
USHBP1	INPP4A	NDUFA4P1
EYA4	TMEM132B	GRSF1
ZNF813	ABRAXAS1	FRRS1L
RAD51	C8ORF34	ENAH
SYNJ2BP	PDE1C	ARSK
RIMS1	SLC16A9	AQR
TMEM26	TAOK1	ZNF43
KANSL1L	SLC25A38	MANSC1
KCNA1	ANKRD63	CHMP1B
SLAMF8	ITM2A	ZNF623
CSPG4	NUP35	NLRC3
RAPH1	CUL4B	NUP85
WHSC1L1	EXOC7	ZNF766
MLST8	PFN2	EXOSC6
HN1L	DEUP1	SLC29A4
ZBTB11	NME6	ANGPT4
CTB-186H2.3	TIAL1	LRRC47
MAATS1	ARMH4	C10ORF111
F2RL1	BAAT	LY6G5B
MCC	CIPC	PCDHA6
RELL1	GPR15	RD3
CLIC4	CASTOR2	MPHOSPH8
GAB3	ZNF45	SIGLEC14
ISCA1	ZNF616	ZNF607
KCTD6	FRYL	ABHD17B
TBC1D10C	F2R	AGBL5
MID1	SMC2	MUC20
AADACL3	WDR72	NMUR1
APC2	SUN1	ELP6
CBX2	R3HCC1L	HUS1
SLC38A1	SASS6	PRRG4
ZNF200	EXOC6B	CRIPT
LRRD1	BTN3A1	UTP15
CASP3	PLXNA4	TRPM7
GPR111	DCP2	TRAF1
XKR6	SUSD1	TNPO3
SOX13	ZBTB21	TMTC1
ATAD2B	ZC3H4	TBC1D19
ACTN1	TAF9B	SYNJ2BP
PTPRG	TOMM20	SNX27
NUP43	BEND6	SHOX
ALKBH8	YWHAG	PDPN
AFG3L2	FAXC	NR2F6
APOL1	ZNF714	LIPC
PWWP2A	SSPN	IRGQ
LINC00632	CDX1	IPCEF1
CNGA1	KLF3	FOSL2
SLC22A13	SLC6A1	FAM208A
ADAMTS18	ONECUT2	ELMSAN1
ERC2	IKZF3	CHORDC1
ASXL2	SKAP2	CDK19
POFUT2	PSMA8	ZNF783
SIRPA	CDH7	ZNF891
NWD1	TIA1	SLC10A6
KCNV1	KMT2D	MGAM
TNRC18	MED7	ZNF585B
IL36RN	ARID2	ZNF583
MFSD10	ZNF682	HOOK3
PIGS	BNIP3L	DCTN6
BDKRB2	RBMX2	ZNF500
FAM65C	NIPAL3	FUT2
PFKFB3	RBM14	POLR3D
VANGL1	MCL1	PLCE1
DGKD	C21ORF62	TMEM59
AL021546.6	MXRA5	MAK
NAV2	GATAD2B	TBL2
FOPNL	ZMAT3	C17ORF85
LOX	MYO19	CRKL
NDRG1	GNG4	CRCP
HECA	HTRA1	PTRH2
ACSM5	HIF1A	RAB36
GRIK4	SHISA9	GPR75
PTK6	SHISAL1	PRIM2
PLEKHA8	LRRTM3	ZNF584
B3GNTL1	ZNF85	KIAA0391
CPM	DENR	ARL8B
SFR1	SEPT7	MACC1
LRRC8B	SDR42E1	MAPK1IP1L
ATP6V1A	ELP3	EVC
TBX15	DNAJC18	SLC15A1
REEP1	SEC11A	AAED1
AKAP7	SUZ12	PAQR7
RASSF1	ZNF396	ZNF638
RBMXL1	PELO	RFC2
DAPK1	MTPN	ZFAND4
ASAP2	ZDHHC17	BRI3BP
SUMF1	DST	PLA2G16
GDF10	CPAMD8	STAT2
TNFSF10	ABCC6	ZNF738
ZNF425	TBXT	ABHD15
DUSP18	MYOZ3	SNRPD1
FBXL12	SPATA22	DTX3L
C11ORF54	RASSF6	RAB19
G3BP2	CHD9	EIF4A3
SOCS6	NEURL1	SLC11A2
YTHDF1	MEAF6	SLC19A3
NFIB	C15ORF61	HRH4
LPIN2	MBOAT2	AGXT2
DSG2	YAF2	SLC38A7
TNPO1	TCFL5	SAR1A
FEZ1	ZNF431	PLEKHB2
BBS10	WDR47	PHACTR4
HRNR	TMEM151A	MTX3
BMP8B	CCNJ	MCUR1
ZBTB42	ASB9	EXOSC2
ARPC5	NPTN	COX6B1
AP1G1	FHIT	CASP8
ZFAT	CALHM2	ZNF99
DGKB	OTUD4	SCARF1
POU2AF1	MAPK10	ACOT2
CLEC5A	OPRM1	GSTCD
PTGDR2	CNTN1	ZNF695
PIK3IP1	HIPK1	EIF3L
DOK6	HOXC6	CPE
HHIPL2	TNFAIP8	NOTO
KIF3B	ZNF746	MFSD4
TBX6	FAM76B	C1ORF174
STXBP1	CABYR	BRIX1
STK11	PHF20L1	MINOS1
RC3H1	EIF1AX	CXORF56
SPRY1	AFP	GEMIN4
UBR2	WASHC5	DTD2
MMS19	MARC1	CACNG8
ZFHX4	WDR75	SLC27A1
ZNF648	C12ORF50	UMPS
ATP2A3	C7ORF57	TPM3
AC079210.1	HIST1H2BD	PARP2
FAM20A	CARF	GLUL
C14ORF182	GCA	DCAF7
KDM5A	TRDN	CYCS
HAVCR1	KIAA0232	C11ORF84
ATP2A2	MED6	C5AR2
VAPB	NFYB	CCDC38
KIAA1143	RNF168	C6ORF141
EFCAB6	NQO1	C5ORF45
CMBL	SLC41A1	CAMLG
KCNT2	TSPYL4	MRPS30
WSCD2	NDST3	ZNF566
FAM47E	NPHP1	GNG4
IQCC	RIT1	RPF2
ZNF721	EIF4E	PLEKHG2
FKBP9	ITGA9	HJURP
C19ORF52	KCNA4	APOL6
AKT2	SYTL4	CENPM
ITGA3	SUV39H2	IKBKG
GOLGA1	CCNB3	SLC24A4
FAM65B	MYO6	TMCO1
EP300	CALHM4	DNAJC28
SBSPON	STAT1	PAK1IP1
ZDHHC15	SLCO1C1	POLR1E
GXYLT2	PTPRE	ZMYM1
KPNA4	ZNF236	NDUFS5
DTX3L	CACHD1	ZSWIM1
MYCT1	KDSR	AS3MT
MTMR1	ERI2	SCNM1
AL138847.1	YES1	NPR1
SPIN2A	SLC9C2	ZNF460
B4GALNT3	KBTBD11	ACBD7
MAFF	SPIN3	RNASEH2B
DPYSL5	CHML	SLC36A2
ZFX	IRAK4	RGS9BP
TMEM239	UBA5	BPNT1
RIN2	GALNT1	MRI1
NR4A3	HNRNPU	CD300LG
CTR9	DARS2	LLGL1
AMER2	CDH2	BVES
LDLR	KALRN	ALG10B
PHACTR2	UBE2D3	TCF23
ANTXR1	FOXP2	ATP6V0D2
EMR1	MEIOC	DENR
C11ORF87	MLLT3	SRD5A1
LMX1B	APPL1	MED16
PDGFB	CASP8AP2	EIF2S3
SH3BGRL2	RHBDD1	C3
HIP1	ZNF330	DHODH
MSANTD3	RFX8	PSMC4
ZNF282	PIAS2	GPKOW
SETD3	CCER1	WSB1
PDE1C	ZFYVE16	RPS27A
STK32C	ZNF180	TXNDC16
ALDH3B1	GIGYF2	TSPYL1
TMEM181	SAMD12	TMEM216
CHMP6	TMPRSS11F	TFDP2
CTNNA1	GALK2	TES
GLRX3	POU2F1	TERF2
RSL1D1	ARL10	SPAST
KATNAL1	EIF2AK3	SOAT1
CHURC1	SGMS1	SLX4IP
LYPD6	NEIL1	SKIL
FAM83F	FGFR1OP2	SHOC2
VSTM4	ITCH	SEPHS1
MTF1	SIGLEC14	RAB4A
HDAC7	PPP2R1B	RAB13
UBE3C	SPRY2	QDPR
OXR1	TDRD5	PURB
SLC7A11	ATP11A	PLA2G4A
TMEM196	PTPRG	PER2
FUT2	KLRC1	PDP2
ZFP91	ZNF765	PACS2
OPALIN	PRR5L	NEK9
C18ORF25	AGMO	MYH9
MMAA	ZNF829	MSL2
KDM4A	DGKB	MSANTD4
SCMH1	TSGA10	MAPKAPK5
ZFAND2B	STYX	KIAA1328
XAF1	SLC16A6	IFNAR2
SLC7A14	ATAD2	GTPBP10
NKX2-4	CKAP2	FBXO45
ITIH5	APBB2	FAM60A
FURIN	MCTS1	EVI5
C1ORF123	OSBPL6	ERN1
ASPH	CAP2	DNAJB9
CCDC50	SLC35A5	CLCC1
ANKEF1	RNF169	CDC73
KPNA3	EIF4G2	CCDC120
DOK4	ENOSF1	BRMS1L
MRPS18B	GRB10	ARL10
GP6	SEPT14	AP1S3
SNX22	IL36G	ANKRD40
KCNC1	ZNF148	AMD1
ARL16	NOL8	AKNA
CTSS	ZNHIT3	SYT15
ZNF844	ZDHHC2	EIF2AK2
EI24	PDE9A	DFFB
PIGM	XKR4	DMWD
KLF7	UBA2	ZNF555
ZNF132	ADGRL3	LYRM4
LCOR	MAP3K15	RETSAT
FRMD1	IPO7	PEBP1
CNDP2	CBX5	IREB2
BSND	PLSCR1	MGAT5
TTYH3	RAVER2	SOCS6
HOXD11	PCDH9	SNRNP25
NAV1	ZMAT1	MTMR7
INMT	CHUK	RGS12
DST	VEZT	ICOSLG
MOB3B	DCP1B	SLC25A22
RPL7L1	ADCYAP1	PRKAB1
RASSF5	OGG1	CSGALNACT1
CDCA7L	IQCH	MRPS15
POLR2D	USP34	TMEM99
LYRM7	PPFIBP1	PHAX
TRAPPC9	ZC2HC1A	C1ORF43
ZC3H4	SYTL5	NME4
MAF	MERTK	PHF20L1
ZNF33A	GEN1	KIF1C
CYP20A1	SCAI	NUP205
B3GALT5	GPR37	ZNF598
H2BFM	NOTCH1	HIST2H4B
GOLGA8A	ZNF761	MXI1
SLC1A2	AQR	NIPA2
AC008394.1	SLC4A7	PRKAR2A
AC019294.1	NAMPT	SIGMAR1
TMEM156	LPAR4	STIM1
C7ORF41	SLC9B2	KDELR1
CRB1	NSG1	HMGCS1
ZNF207	RHOBTB1	EIF4A1
ZNF283	SERINC5	RPL7L1
ZNF737	MARS2	ATXN7L3B
SP7	NRP1	UBC
ZNF578	MTMR7	RPSA
HGSNAT	ARL3	EIF3L
RIPK4	GPR22	HOXA9
PDPK1	RAP2A	BRD2
HCN3	PARG	ISOC2
GNAQ	BTBD7	FAM3C
AGO4	MTMR2	TMEM127
ADIPOR2	FOXJ3	SOD2
ELMSAN1	CFL2	PEG10
GPR26	WDR36	CTNNA1
LRSAM1	PARP8	HIST2H3A
VENTX	CNGA1	PAPD5
RSAD2	MFAP5	RAI1
GPR124	ST6GALNAC1	COL4A1
CASZ1	DDIT4L	GAPDH
BX255923.1	CD302	MAP3K5
PTGER3	F13A1	TSPAN14
ZNF154	LY75-CD302	TBC1D9B
FAM26E	SRGAP2	AGO1
FMNL3	PON3	RPL32
STC2	UBE3A	PIP5K1A
RPP14	VPS41	ZNF395
ARL11	EEF1E1	C19ORF54
ZNF880	SPRTN	PHLDA3
CCDC42B	NAP1L1	ADRM1
LAT2	ZBTB43	ELL
SYT5	COL11A1	AXIN1
ADCYAP1R1	C15ORF65	TACC3
EMC10	PIK3C2A	NDUFC2
MED12L	ALCAM	ZNF436
METTL7B	GPX3	MFSD12
DNMT3A	HPGDS	TIAM1
PPM1L	DCUN1D3	YY1
FAM20C	DIPK2A	RNASEK
AP005482.1	FGF1	INTS1
RNF114	FRS2	POM121
ID3	CCDC182	EEF2
PTBP2	LSM8	PHKA1
ZNF660	ABHD5	METTL13
POM121	SPTLC2	HNRNPH3
DMRT2	APOOL	SRRM2
DIP2C	NR2E1	C11ORF58
USP6NL	SNX18	PLEC
GPR157	HEBP1	ATP6V1F
MIB1	TMPRSS15	CD81
MAPK8	RNF217	MBTPS1
NOTO	MRPS30	AP1B1
ESRRG	TMEM246	ACLY
THEM6	NWD1	HOXA11
GLIS2	MYLK	POLR3A
GPR135	ZNF512	ANXA2
AVPR1B	HS6ST2	TRIM37
RAD52	RPRD1A	RPL13A
AHRR	OAZ2	CLCN7
SEPT2	ABCC9	ESF1
HS3ST1	AEBP2	RNF4
F11R	FLT1	TRAP1
ZNF687	CHMP4B	ACTG1
DZANK1	GPATCH2	EMILIN3
SP6	KDM5A	RPL23A
LZTS3	STOX2	ZFAND5
IP6K1	ANKRD29	DLX4
DHH	S1PR1	GOLGA4
CDH5	EIF3A	HIST1H2AI
AFF4	SPIRE1	PPP1R15B
RTKN2	ZNRF2	HIST1H2BF
SH3PXD2A	MATN4	LRRC55
PDE4DIP	NT5C3A	ZNF275
XIAP	PAFAH1B2	HIST2H4A
FRS2	PAPOLA	FUT10
SAMD11	MITF
MAPK13	FAM218A	STMN1
KLK2	HS2ST1	STAU1
PSMF1	ELK3	SPRY4
ABCB8	ZSWIM6	LMBR1L
RNF121	IFT81	CNNM4
PPIC	PHTF2	CDK2
KIAA1919	ZNF107	PEX10
SULF1	GRM5	PPM1F
PPP1R18	DNAJB9	CNGA2
ADRB1	MMP24	PRPF4
FBXW7	GABRA4	COX19
BEND4	REPS2	KCTD21
LITAF	COL25A1	CHST6
PPP4R1L	PCLO	SLC16A13
PPAPDC2	RRM2B	ZFP14
TMEM261	KPNA3	IVD
CD300LB	MIB1	RAB9A
ZNF695	PLEKHH1	LMTK2
VPS13B	MYOM3	FAM63B
GPR63	PTPRB	FAM126B
TPCN2	ZNF813	CACYBP
YWHAG	PGRMC2	BUB1
EPHA3	DCAF12	PACS1
HAP1	BARX2	SULT1B1
EVX2	TTC19	GPR137C
SMC1B	DNAJC15	CLOCK
XPA	ETV5	EMB
BCKDHB	CLASP2	TMEM245
MAPK14	BMT2	STC2
EDARADD	LAMA2	RB1
APAF1	NRCAM	IGFBP5
CDH3	SKIL	MTRNR2L1
TUB	SHISA2	Pxdn
PLD1	GFM2	FAM26E
KIF5A	DNAL1	PDF
DNAJC27	PTGES3L	STAG1
SEC14L6	MAP9	HMGN5
ZNF674	TARDBP	UBE2F
FMN1	TMED2	ZNF439
SLC35C1	GNRHR	SP110
ZSWIM6	QSER1	TCEB1
LSM11	ARHGAP20	FAM46B
VAPA	ROCK2	WASF2
PARD6B	PLEKHA5	SHE
TAF8	ZNF451	SCO1
RGAG4	VPS4B	LDHA
NR2E1	SLC5A1	GALNT10
PLXNC1	PDE4D	DARS
IRG1	E2F7	THAP1
CYP2W1	AIDA	WFDC6
GJA9	YIPF4	MICA
SPG7	NTNG1	DCTN5
ZC3H12C	PUS10	TNFRSF10B
CTDSPL	PIGA	ISCA2
NIP7	SLC15A1	TMED2
C22ORF29	GALNT12	NSD1
UBN2	TP53TG3C	BRI3BP
SLC6A20	CPEB3	ACY1
MYOD1	PPM1K	ABHD14A-ACY1
SEPT8	ZC3H6	TOP2B
C1ORF109	RAP1A	NCAPG2
CROT	MFN1	RAB21
ELOVL2	TACC1	ABHD12
CD58	ZNF805	CD4
PLXDC2	MRPL42	RPS6KA1
DUSP2	CDC42EP4	PEAK1
AGPAT4	HACD4	PLEKHA1
FAM160B2	VAPB	CREBRF
RAF1	MIXL1	RORA
CYP24A1	MID1	SETD1B
ANAPC16	NWD2	CDK6
CUL5	SVIP	WEE1
CLCN5	SLC11A2	PAWR
SRPX2	CDK19	MYNN
RUNX1T1	EPCAM	ARL5B
AC025278.1	C5ORF51	ARHGAP39
SPTLC3	TAPT1	CASC5
ADAMTS1	JMJD1C	PHYKPL
XKR8	MTRF1L	LIN54
RAB6A	C9ORF72	BLOC1S2
SLAMF6	ZADH2	ZWINT
RIC3	TMEM273	USP46
C17ORF102	BZW1	ID2
SLC25A22	LRRC58	SLC23A1
EPHA4	SYNJ1	TRIM37
GRAMD1B	MATR3	MORF4L1
AGR2	TP53TG3D	SOD2
OXSR1	TP53TG3B	ADAMTS4
AC002472.13	CEP63	TYW5
JMJD4	MPC2	SLC2A3
GP2	ZBTB39	FAM179A
SLC25A25	PLAA	ATF3
ZNF572	ARL5A	PCSK1
PGM2L1	PCMTD2	HNRNPA1
UBR4	PNISR	GRIN2B
SCLY	ANKRD44	EFNA5
MIER3	SMG1	FOXO3
SAMHD1	RGS7BP	PPP1R12A
C4ORF40	TP53TG3	DMPK
ERI2	TMEM248	MARVELD2
KPNA6	FSTL4	IREB2
PARVB	ATXN1	HMGB1
GIMAP4	CDC26	NR3C1
MAPK1	CAB39	FOXJ3
NEU3	PBX1	ALDOA
C1QTNF6	PDE4B	Dmpk
MINA	WDR26	AADAC
ARRDC3	PLSCR2	HACE1
GCNT4	RERG	CREB5
FAM200B	DPP6	FAM57A
DGKH	ZC3HAV1	GXYLT2
EMP2	HTATIP2	DPH3
RABL5	GPR137C	ZNF284
PRKAR2A	SUCO	DIP2A
ABCF1	NR1D2	RUNX1
DEPDC5	AMOTL1	PERP
TAF2	COL5A2	PARD6B
SLC22A3	OTULINL	NEGR1
RAB27B	ZNF559	MAML1
TMEM180	MTFR2	NUDT3
FAXDC2	SOX11	STK25
CCDC170	GPC6	SOAT1
ZNF528	GOLPH3L	FHOD3
SPEM1	NPAT	RPL7A
TRPV2	NSL1	NCAPD2
HERC4	AFF4	RPS8
KPNA5	TFEC	AHNAK
ZNF491	EPM2AIP1	ACTB
ZNF644	ISCA2	DEF8
MPZL1	NAV3	MET
PSMD12	RIC8B	MED13
FAM3C	ZNF596	FAT3
METTL2A	MSANTD3	HUWE1
DGKQ	JADE3	RPS16
PEX11A	PREPL	CDK6
NHLRC2	TCAIM	GEMIN5
FCF1	LRRIQ3	PITRM1
AFAP1L1	IFNA1	PRRC2A
ZNF280C	CHM	KIAA0226
ADCY7	MPP7	MLLT6
PTBP3	ARL6IP1	EIF3I
IL2RA	ELMOD2	FASN
C15ORF53	SGMS2	LEPREL4
TSEN2	TMEM62	HSCB
TNFRSF9	NHSL1	PSME4
CDR2L	CCDC144NL	FRS2
RAB6C	VPS26C	ZNF264
TMEM86A	CSPP1	HYLS1
GRIA1	CYP2U1	USP54
ATP8B3	ZBTB7A	L1TD1
FUT6	ADAM12	OR51E2
LDLRAD4	CCDC198	CLDN18
AAK1	ZNF432	RPS3
MAVS	C1QTNF9B	RAB22A
ATXN3	TPM1	TBPL1
CDK6	USP47	TWF1
KCNH5	DCDC2	FNDC3A
NBEAL1	MED28	PURB
P2RY2	MKLN1	UBN2
CD276	PRDM9	BUB3
ZNF317	ITGB8	C11ORF57
CEP57L1	NXPE1	GXYLT2
AC006372.1	MBLAC2	NDUFB5
STARD13	MCMDC2	NEU3
PRICKLE2	PCSK5	SLC30A10
RAD9B	NUFIP1	PRPF4
CRTC3	HDAC2	NUCB1
RAB2B	LYRM9	SRSF3
PNP	GRIA3	KIF2C
CHCHD4	IKZF1	ZYG11B
ZNF101	MAP3K13	UBE2S
LL22NC03-63E9.3	GPNMB	NUP133
FRRS1	RRP1B	YOD1
TRA2B	B4GALT5	THAP1
C12ORF45	TMEM232	SPTY2D1
SLC28A3	ARHGEF35	SDHD
FN1	SMU1	RNF126
NELL2	LTBP3	NCBP2
FAM153B	FNTA	CDKN1B
TEDDM1	BCAT1	FAM177A1
MAML2	CDC42	IL6ST
SYT13	RNF111	H2AFZ
ACER1	ARID5B	ATF7IP
UNC5A	TAB3	SUMO2
ZFP3	SERBP1	RBPJL
ARHGAP32	SLC9A6	PCSK9
HIST2H4B	RAB5B	NRAS
STXBP6	DKK2	GINS4
BBS5	MSL2	MAVS
GBP6	HMCN1	IGDCC4
RASEF	KDM4C	HOXA10
USP28	KDSR	LAYN
ARHGAP28	HSP90B1	NIPAL3
SYNGR4	TMEM139	NTMT1
CHDH	ZSWIM9	PARK2
PLEKHM3	POLQ	HINFP
USP46	RFC3	NDUFV3
SLC35B4	TPBGL	NLRP9
TADA2B	AP3S1	ABHD15
ZBTB34	C4ORF19	SRSF10
BCL7A	SP8	RNF213
PPM1K	SLC25A23	PPIC
BHLHE41	CCDC92	CHRNB1
TMEM178B	WBP1L	ILDR1
PNPLA5	EYS	CYR61
ZC3H6	ILDR2	COLEC10
SLC2A10	PGK1	ZNF485
LGALS8	NSFL1C	KNSTRN
MPL	PIP5K1A	ZNF662
ZBTB8A	C5ORF15	KIAA1549
SOX7	TMED2	RNF20
AMN1	GALNT10	C9ORF64
UVRAG	GABRG2	GIGYF1
ONECUT2	HEY2	FBXW7
FOXN3	KRTAP17-1	EIF1AX
ABHD17A	DCLRE1C	DAZAP1
LDLRAP1	CBLN2	COLEC12
NSG2	NECTIN2	HDDC2
PGPEP1	DACT1	AKAP8
STEAP3	C11ORF58	PGRMC1
KIAA1456	SP7	MAP3K5
ZNF804B	PEG10	HOXD13
ACOT11	IKZF1	CLSPN
ADAM28	C6ORF136	SON
ZNF835	ZNF708	COMMD2
PRKX	PBXIP1	PLA2G16
TMPPE	SFRP5	PARP1
C5ORF30	LMBR1L	KLHL9
SYNPO2	ASAP1	ZNF556
SGCB	KLF7	API5
TMOD3	DPY19L4	CCS
NKRF	PTPN11	ZNF793
MCUR1	NOVA1	MACC1
ORAI3	PSMD14	GNE
CDON	KIAA0754	ZNF813
TRANK1	FAM19A2	PHF20
DAAM2	GPR180	PPDPF
RP11-247C2.2	EVPL	ZNF708
CD164	PPP1R12B	KIR3DX1
THSD4	APLP1	SLC26A2
MTMR4	TGM2	YIPF4
FAM46A	HP1BP3	GUCA1B
MISP	USP13	ART4
FNBP1L	SLC25A32	ZMYM1
SFXN5	CDK18	TAOK1
TRIP13	TTPAL	RNF19B
CLASP2	CTNNB1	KREMEN1
BLOC1S5	RNF175	IPO9
RNF139	BSDC1	FAM63A
JPH2	TCHP	DPP8
TFDP2	CCDC22	DNAH10OS
SLMO2	ATP2B1	RNF8
KLF13	MEIS2	PLIN3
ZC3H12D	LYRM7	GDE1
CECR1	PPIE	MCUR1
IPO7	PPTC7	CENPN
NTSR1	PSEN1	ZNF677
STARD9	IL11	RELA
NOV	KCTD4	IPP
ZCCHC17	ATF7IP2	ICA1L
ARSI	ESRP2	POLR3A
FAM46C	AQP7	LYPLA1
DCLK1	ZNF280D	NEK8
TLDC1	ITCH	VHL
ZIC5	GPC4	RRP36
ZDHHC24	SLC35A3	ZNF384
P2RX7	ETS1	UTP6
SLC35F2	KDM8	TLCD2
DKFZP667F0711	GPR6	PTPRJ
OTOG	RPS6KB1	MYO5A
ZNF470	INTS3	MSRB3
NAV3	CALHM5	GMEB1
FMNL1	SEC14L1	GATSL2
RPL28	CCDC30	DUSP19
ARL6	HKR1	DENND6A
POLR2F	TNRC6C	DCX
SMAGP	LOC730098	ADRBK2
HSPA6	GNPNAT1	FAHD1
RRAGD	INTS9	C10ORF32
AHCYL1	ATXN1L	WDPCP
ANK3	TUBGCP5	RHOBTB3
SLC10A2	CYP4V2	GPR156
STMN3	ISOC2	RSBN1L
C7ORF65	TNFRSF1B	IFNAR1
ZMYM4	OSBP	SPPL3
ATP5E	GPBP1L1	LMOD3
ZHX3	ZCRB1	MIOX
GIGYF2	PAQR9	ATP5G1
IRAK3	HAPLN1	BACE2
ZKSCAN4	TARP	C2ORF68
BRWD1	GPR158	TTPAL
TIRAP	POU2F3	CPS1
VWC2	MYCL	ZNF101
TXNDC15	RAP1GAP2	AKAP6
BSPRY	EMILIN3	LARS
ACVRL1	SYNCRIP	TRAT1
G3BP1	VPS39	MAP4K2
MTIF2	HNRNPA0	CACNG8
DCLRE1B	KSR2	ORMDL2
HOXD12	FGF23	HEATR5A
SMAD6	H2AFV	PHKA1
MTR	COMMD9	GPR183
BBS12	NUTM1	ZNF669
LRRC58	COLEC12	ZFP30
ZNF486	CSRNP2	RBM18
CBFA2T2	LRRC27
MAGOHB	STMN1
WDR81	ZNF736
TMEM132B	NCAM1
ZNF417	CUX1
CHRNB2	DYNC1I2
KIF26B	PRDM16
MYO3B	KRI1
SCML2	KIAA0930
IFNAR1	SELENOT
R3HCC1	XAF1
NKAP	ASTN1
PLXND1	BCAN
ZNF321P	GAP43
ADD2	GEMIN7
ARF6	SFXN3
SAP18	CRAMP1
IGSF3	CKAP2L
CCDC152	ADGRL3
NCF4	CFLAR
OSBPL11	C3ORF35
CHST10	TRERF1
PIWIL2	SUMO1
NPC1	ST8SIA3
RIMS4	PADI4
SLC6A15	TNFSF10
YIPF4	FOXP1
SCYL2	SEPT4
TAPBP	FAM222A
PARVA	ZNF124
PRICKLE1	SNAP23
ZNF445	KIF20B
ZNF587	MAP7D2
RPL23	ITLN1
MRGPRF	SLC36A2
NUP155	CCDC141
ADAT1	FANK1
GIPR	TSTD2
AP000867.1	FOXE3
PHF21B	PBRM1
ATRN	TSPAN9
GPR12	CD28
KBTBD11	SGO2
AGO3	CPB1
ATP6V1C2	SCN8A
C21ORF58	CHD1
POLR1A	MBNL3
UBE4A	RNF212B
GNPDA2	NSD1
SLC9B2	RASGEF1B
APOLD1	STIM1
GRIN2B	RPGR
GAPT	PAQR3
PRMT2	ADAL
HEY2	TSHZ3
C21ORF62	LCE1A
RAD51D	PAPOLG
ZNF236	POU2F1
LRRC8E	C2ORF49
SREBF1	SCML4
ZNF394	DENND2C
NOS1AP	ZFP91
MYBBP1A	ERC1
IVD	ARL17A
GMFB	STX3
THG1L	ASB7
ATP2B1	LIX1L
UHRF1BP1L	SERPINF2
TAF1L	RALY
SERAC1	SOD2
ONECUT3	CD55
GREM1	SLAMF6
SLC1A3	HOXB6
ANLN	PDE12
ZNF430	ZNF862
COG3	GOLGA7
NFYB	KCNJ3
GABRA4	WNK4
CCDC113	MAP3K8
RPRD2	RASL12
URB2	IKZF3
WDR89	CBX2
CPNE5	RPL27A
ADAM19	PCBD1
CERK	SH2D2A
MUC21	GLCE
ZNF665	CLDN10
SCN3A	TVP23C-CDRT4
COX7C	MARCKS
DCUN1D3	MKLN1
PDE3A	B4GALNT1
MITF	CLIP3
QSER1	SMARCE1
C6ORF106	DOK1
CCDC127	TAOK1
UNC5C	SLC39A4
LHFPL2	SRSF1
ABHD15	SYNPO2
AJAP1	INPP5F
GYS1	TRAK2
SCN2A	RGCC
ZDHHC3	TEK
HSD17B12	MEF2C
MGA	FBXO33
AP3M2	EIF4E
SMAD3	TLR8
ACHE	ZDHHC9
KIAA0226	GPRASP1
LIN28A	RAET1E
SEPT11	COQ4
ADAMTSL1	LMCD1
SURF6	LIMK1
HEY1	UTRN
CENPBD1	ZNF793
CD46	UPK1A
SLC12A6	CYSLTR2
CYB561D1	STC1
DOCK11	GPATCH2L
SEMA3D	SPRY3
ARL5B	SURF6
CSGALNACT2	C11ORF54
RDH13	ASPH
SEMA6D	GRIA1
IPP	XKR8
FAM84A	STX12
SLC38A4	KCNN3
PEX5L	MOCS1
GRM1	FARSB
GPR133	GPR155
RWDD2B	CLIC5
RCHY1	SLC39A5
TMEM56	XK
CREG2	KCNJ6
GPR180	GTF3C5
TSPAN14	BAHD1
SNRPD3	GNG13
PAPLN	PNPLA7
PRKG1	ARFGEF1
MAP2K7	EPS8
C16ORF58	TNPO1
C15ORF39	GCC2
SLC4A4	SHISA7
TMPRSS2	DCUN1D4
CLCN6	AGFG1
C9ORF139	ADAMTSL3
GSTK1	ARHGEF26
GNB4	CSNK1G1
IGF1	EYA1
TOMM20	ZNF329
ZNF442	GXYLT1
DDX52	BTG1
GNL3L	USP46
CSNK1A1	SEMA6A
TXK	NPAS3
DOT1L	PLEKHJ1
UNKL	DNAJC27
CLPB	SYNJ1
F2RL3	PDS5B
TRIM33	AK4
CAMK2B	RASSF8
RASL10B	ATAD2B
ERLIN2	CDS1
PNO1	VPS35
TOR1B	FBXO34
MRPS25	SBF2
PURB	ABHD17C
ATP5S	TFAP2B
PVRL1	VAV2
LPCAT2	NEO1
GPR107	BTBD11
ADAP2	ABHD6
USP12	FAM184A
GPR37L1	TAB3
KCNJ2	PXN
SGPL1	KIAA1109
WBSCR27	UGCG
MYRF	NCALD
DIAPH2	CUBN
SEC24A	FAM76B
JAZF1	TSC22D2
SKIL	PLCL2
EIF5A2	CLSTN2
LIPG	ST3GAL6
SLC7A1	WNK3
GM2A	BTN1A1
PDK1	INO80D
NCMAP	MT1F
AHCY	CLK2
HSPA4L	SLC25A25
RAD1	SERP1
ZNF512B	PRR3
MPHOSPH8	INSM2
GTF2H3	KCNK2
SFMBT2	AKIRIN2
RBMS2	ZNF44
FOXF1	BHLHE22
PPIA	EHBP1
GRAMD3	TMCC1
STMN2	RCAN1
SULT2A1	MMD
RAB3D	TBR1
C6ORF223	SNN
FUT11	ARL4C
ACBD7	TNRC6B
NCKAP5L	KAT2B
STRN3	RAPH1
FEM1A	GOLGA1
LONRF2	HMGCR
C4ORF32	CHD7
AL590235.1	PHF3
FSCN1	FRMD6
ARHGAP23	SNX10
IGFBP5	JMJD8
TTC9	CKAP4
STARD5	NECAP1
CRCP	FBXO10
CORO1C	LOC388813
ZNF182	FBXW7
SNX8	PTGER3
ATCAY	DIPK1A
MT1A	ZNF334
IQGAP1	ZHX1
RP11-455G16.1	NPTN
[truncated: 30,740 more rows]
